# Supplementary material for: Mobile Technology for Community Health in Ghana: Is Maternal Messaging and Provider Use of Technology Cost-Effective in Improving Maternal and Child Health Outcomes at Scale?
Source: PubMed Central journal article supplement (PMC6391645; doi:10.2196/11268), 2019-02-13
Supplement: jmir_v21i2e11268_app2.pdf [file jmir_v21i2e11268_app2.pdf]

**Multimedia Appendix 2. Health Effects Adjusted for District Rollout and Duration of MOTECH Program Implementation.**

| Inter-vention                | Changes in coverage by intervention type                      |                                              |                                              | 2015                                                                                                                                    | 2016         | 2017         | 2018         | 2019         | 2020         | 2021         | 2022          | 2023          | 2024          |
|------------------------------|---------------------------------------------------------------|----------------------------------------------|----------------------------------------------|-----------------------------------------------------------------------------------------------------------------------------------------|--------------|--------------|--------------|--------------|--------------|--------------|---------------|---------------|---------------|
|                              | Annual increases in coverage until 75% of population reached* | Annual increase in coverage between 75 – 90% | Annual increase in coverage between 90 – 99% | Modeled coverage increase by base case program coverage effect for districts, adjusted for time and level of coverage in the population |              |              |              |              |              |              |               |               |               |
| Facility delivery            | <b>Base: 10.4%</b>                                            | <b>5.20%</b>                                 | <b>2.60%</b>                                 | <b>57.1%</b>                                                                                                                            | <b>67.5%</b> | <b>77.9%</b> | <b>83.1%</b> | <b>88.3%</b> | <b>90.9%</b> | <b>93.5%</b> | <b>96.1%</b>  | <b>99.0%</b>  | <b>99.0%</b>  |
|                              | Upper: 18.8%                                                  | 9.42%                                        | 4.71%                                        |                                                                                                                                         |              |              |              |              |              |              |               |               |               |
|                              | Lower: 2.0%                                                   | 0.99%                                        | 0.49%                                        |                                                                                                                                         |              |              |              |              |              |              |               |               |               |
| SBA                          | <b>Base: 11.02%</b>                                           | <b>5.51%</b>                                 | <b>2.75%</b>                                 | <b>58.7%</b>                                                                                                                            | <b>69.7%</b> | <b>80.7%</b> | <b>86.2%</b> | <b>91.8%</b> | <b>94.5%</b> | <b>97.3%</b> | <b>99.0%</b>  | <b>99.0%</b>  | <b>99.0%</b>  |
|                              | Upper: 19.4%                                                  | 9.72%                                        | 4.86%                                        |                                                                                                                                         |              |              |              |              |              |              |               |               |               |
|                              | Lower: 2.6%                                                   | 1.30%                                        | 0.65%                                        |                                                                                                                                         |              |              |              |              |              |              |               |               |               |
| Measles                      | <b>Base: 6.0%</b>                                             | <b>2.99%</b>                                 | <b>1.50%</b>                                 | <b>91.0%</b>                                                                                                                            | <b>92.5%</b> | <b>94.0%</b> | <b>95.5%</b> | <b>97.0%</b> | <b>98.5%</b> | <b>99.0%</b> | <b>99.0%</b>  | <b>99.0%</b>  | <b>99.0%</b>  |
|                              | Upper: 10.3%                                                  | 5.14%                                        | 2.57%                                        |                                                                                                                                         |              |              |              |              |              |              |               |               |               |
|                              | Lower: 1.7%                                                   | 0.84%                                        | 0.42%                                        |                                                                                                                                         |              |              |              |              |              |              |               |               |               |
| <b>Number of Lives Saved</b> |                                                               |                                              |                                              |                                                                                                                                         |              |              |              |              |              |              |               |               |               |
| Maternal                     |                                                               |                                              |                                              | 0                                                                                                                                       | 43           | 149          | 288          | 395          | 636          | 950          | 1,224         | 1,283         | 1,330         |
| Child                        |                                                               |                                              |                                              | 0                                                                                                                                       | 288          | 1,001        | 1,941        | 2,668        | 3,749        | 5,038        | 6,119         | 6,397         | 6,596         |
| Stillbirth                   |                                                               |                                              |                                              | 0                                                                                                                                       | 152          | 534          | 1,043        | 1,444        | 2,119        | 2,957        | 3,678         | 3,872         | 4,012         |
| <b>Total Lives Saved</b>     |                                                               |                                              |                                              | <b>0</b>                                                                                                                                | <b>483</b>   | <b>1,684</b> | <b>3,272</b> | <b>4,507</b> | <b>6,504</b> | <b>8,945</b> | <b>11,021</b> | <b>11,552</b> | <b>11,938</b> |

\*Data drawn from the independent evaluation of MOTECH in Gomoa West led by the Healthcare Innovation Technology Lab in partnership with University of Ghana School of Public Health
