# Supplementary material for: Mobile Technology for Community Health in Ghana: Is Maternal Messaging and Provider Use of Technology Cost-Effective in Improving Maternal and Child Health Outcomes at Scale?
Source: PubMed Central journal article supplement (PMC6391645; doi:10.2196/11268), 2019-02-13
Supplement: jmir_v21i2e11268_app3.pdf [file jmir_v21i2e11268_app3.pdf]

**Multimedia Appendix 3. Parameters for probabilistic sensitivity analyses.**

Deterministic values draw from 10 year estimates of costs and consequences of MOTECH implementation across 170 districts.

| Parameter                          | Deterministic      |                    |                    | Distribution | Probabilistic      |                |                | Distribution parameters | Mean              | SD               |
|------------------------------------|--------------------|--------------------|--------------------|--------------|--------------------|----------------|----------------|-------------------------|-------------------|------------------|
|                                    | Base case          | High               | Low                |              | a                  | b              | c              |                         |                   |                  |
| <b>Development</b>                 |                    |                    |                    |              |                    |                |                |                         |                   |                  |
| Program Design                     | \$36,800           | \$46,000           | \$34,872           | Gamma        | \$36,396           | 174.977        | 210            |                         | 36,800.00         | 2,782.00         |
| Telecommunications                 | \$23,480           | \$24,170           | \$23,232           | Gamma        | \$23,554           | 10,020.685     | 2              |                         | 23,480.12         | 234.56           |
| Technology                         | \$16,907           | \$18,599           | \$16,011           | Gamma        | \$16,793           | 682.730        | 25             |                         | 16,906.67         | 647.04           |
| Vehicle Maintenance                | \$8,910            | \$9,515            | \$8,443            | Gamma        | \$8,800            | 1,105.579      | 8              |                         | 8,910.07          | 267.97           |
| Office Maintenance                 | \$15,595           | \$17,156           | \$14,769           | Gamma        | \$15,945           | 682.730        | 23             |                         | 15,595.37         | 596.86           |
| Personnel and Benefits             | \$596,955          | \$746,193          | \$553,634          | Gamma        | \$652,325          | 153.771        | 3,882          |                         | 596,954.68        | 48,139.83        |
| <b>Subtotal Development</b>        | <b>\$698,647</b>   | <b>\$861,633</b>   | <b>\$650,960</b>   | <b>Gamma</b> | <b>\$659,540</b>   | <b>175.961</b> | <b>3,970</b>   |                         | <b>698,646.91</b> | <b>52,668.26</b> |
| <b>Start Up</b>                    |                    |                    |                    |              |                    |                |                |                         |                   |                  |
| District Profiling                 | \$150,919          | \$198,874          | \$102,963          | Gamma        | \$135,445          | 39.616         | 3,810          |                         | 150,918.69        | 23,977.70        |
| Content Localization               | \$30,690           | \$38,363           | \$23,018           | Gamma        | \$30,798           | 64             | 480            |                         | 30,690            | 3,836            |
| Equipment                          | \$2,471,799        | \$2,926,175        | \$1,799,322        | Gamma        | \$2,492,618        | 77             | 32,107         |                         | 2,471,799         | 281,713          |
| Customer Support                   | \$249,746          | \$312,182          | \$187,309          | Gamma        | \$263,174          | 64             | 3,902          |                         | 249,746           | 31,218           |
| Training                           | \$2,406,578        | \$3,008,222        | \$1,804,933        | Gamma        | \$2,254,763        | 64             | 37,603         |                         | 2,406,578         | 300,822          |
| Community Mobilization / Marketing | \$627,638          | \$784,547          | \$470,728          | Gamma        | \$551,917          | 64             | 9,807          |                         | 627,638           | 78,455           |
| Partnership Building               | \$10,449           | \$13,061           | \$7,837            | Gamma        | \$12,241           | 64             | 163            |                         | 10,449            | 1,306            |
| Vehicle Maintenance                | \$172,082          | \$215,102          | \$129,061          | Gamma        | \$187,357          | 64             | 2,689          |                         | 172,082           | 21,510           |
| Office Maintenance                 | \$86,277           | \$107,846          | \$64,707           | Gamma        | \$87,258           | 64             | 1,348          |                         | 86,277            | 10,785           |
| Telecommunications                 | \$77,166           | \$95,933           | \$57,874           | Gamma        | \$73,622           | 66             | 1,173          |                         | 77,166            | 9,515            |
| Technology                         | \$26,318           | \$32,898           | \$19,739           | Gamma        | \$25,817           | 64             | 411            |                         | 26,318            | 3,290            |
| Personnel and Benefits             | \$1,193,847        | \$1,497,592        | \$895,385          | Gamma        | \$1,121,524        | 63             | 18,986         |                         | 1,193,847         | 150,552          |
| <b>Subtotal Start up</b>           | <b>\$7,503,508</b> | <b>\$9,230,796</b> | <b>\$5,562,878</b> | <b>Gamma</b> | <b>\$8,574,782</b> | <b>67</b>      | <b>112,061</b> |                         | <b>7,503,508</b>  | <b>916,980</b>   |
| <b>Implementation</b>              |                    |                    |                    |              |                    |                |                |                         |                   |                  |
| Technical Groups                   | \$17,810           | \$22,263           | \$13,358           | Gamma        | \$17,684           | 64             | 278            |                         | 17,810            | 2,226            |
| M&E                                | \$1,700,567        | \$2,125,709        | \$1,275,425        | Gamma        | \$1,832,128        | 64             | 26,571         |                         | 1,700,567         | 212,571          |
| Continued Training                 | \$2,140,605        | \$2,675,757        | \$1,605,454        | Gamma        | \$1,885,825        | 64             | 33,447         |                         | 2,140,605         | 267,576          |
| Equipment & Materials              | \$4,928,480        | \$6,054,802        | \$3,526,178        | Gamma        | \$5,170,477        | 61             | 81,084         |                         | 4,928,480         | 632,156          |
| Vehicle Maintenance                | \$1,078,131        | \$1,347,663        | \$808,598          | Gamma        | \$972,268          | 64             | 16,846         |                         | 1,078,131         | 134,766          |
| Field Office Maintenance           | \$209,521          | \$211,407          | \$164,481          | Gamma        | \$200,623          | 319            | 657            |                         | 209,521           | 11,732           |
| Office Maintenance                 | \$257,036          | \$317,618          | \$192,777          | Gamma        | \$275,448          | 68             | 3,790          |                         | 257,036           | 31,210           |
| Telecommunications                 | \$2,343,275        | \$2,929,093        | \$1,757,456        | Gamma        | \$2,544,513        | 64             | 36,614         |                         | 2,343,275         | 292,909          |
| Technology Support and Maintenance | \$241,582          | \$301,977          | \$181,186          | Gamma        | \$245,022          | 64             | 3,775          |                         | 241,582           | 30,198           |
| Personnel and Benefits             | \$11,218,454       | \$14,023,06        | \$8,413,841        | Gamma        | \$11,327,320       | 64             | 175,288        |                         | 11,218,454        | 1,402,307        |

|                                |                     |                     |                     |                  |                     |           |                |                   |                  |
|--------------------------------|---------------------|---------------------|---------------------|------------------|---------------------|-----------|----------------|-------------------|------------------|
|                                |                     |                     | 8                   |                  |                     |           |                |                   |                  |
| <b>Subtotal Implementation</b> | <b>\$24,135,461</b> | <b>\$30,009,358</b> | <b>\$17,938,754</b> | <b>Gamma</b>     | <b>\$20,659,061</b> | <b>64</b> | <b>377,296</b> | <b>24,135,461</b> | <b>3,017,651</b> |
| <b>Total Societal Cost</b>     | <b>\$32,337,616</b> | <b>\$40,101,787</b> | <b>\$24,152,592</b> | <b>Gamma</b>     | <b>\$32,919,189</b> | <b>66</b> | <b>491,643</b> | <b>32,337,616</b> | <b>3,987,299</b> |
| <b>LIVES SAVED</b>             |                     |                     |                     |                  |                     |           | Media<br>ln(x) | SD ln(x)          |                  |
| Maternal                       | 6,298               | 8,519               | 1,133               | Lognormal        | 4,625               | 9         | 0.51           |                   | 6,298            |
| Children < 5 years             | 33,797              | 43,390              | 8,356               | Lognormal        | 15,686              | 10        | 0.42           |                   | 33,797           |
| Stillbirths                    | 19,811              | 26,079              | 4,407               | Lognormal        | 15,025              | 10        | 0.45           |                   | 19,811           |
| <b>Total Lives Saved</b>       | <b>59,907</b>       | <b>77,988</b>       | <b>13,896</b>       | <b>Lognormal</b> | <b>66,824</b>       | <b>11</b> | <b>0.44</b>    |                   | <b>59,907</b>    |
| <b>DALYs</b>                   |                     |                     |                     |                  |                     |           |                |                   |                  |
| Maternal                       | 149,409             | 202,100             | 26,875              | Lognormal        | 109,810             | 12        | 0.51           |                   | 149,409          |
| Children < 5 years             | 968,589             | 1,243,528           | 239,474             | Lognormal        | 1,058,249           | 14        | 0.42           |                   | 968,589          |
| Stillbirths                    | 567,767             | 747,402             | 126,298             | Lognormal        | 627,775             | 13        | 0.45           |                   | 567,767          |
| <b>Total DALYs Averted</b>     | <b>1,685,765</b>    | <b>2,193,029</b>    | <b>392,647</b>      | <b>Lognormal</b> | <b>2,081,914</b>    | <b>14</b> | <b>0.44</b>    |                   | <b>1,685,765</b> |
